# Supplementary material for: A Functional K+ Channel from Tetraselmis Virus 1, a Member of the Mimiviridae
Source: MDPI journal article supplement (doi:10.3390/v12101107), 2020-09-29
Supplement: s1 [file s1]

**Supplemental Table 1.** Virus names and abbreviations

| Virus                                    | Abbreviation |
|------------------------------------------|--------------|
| Tetraselmis virus 1                      | TetV-1       |
| Chrysochromulina sp. virus SA1           | CsV-KB1      |
| Florenciella sp. virus SA2               | FloV-SA2     |
| Rhizochromulina sp. virus SA1            | RhiV-SA1     |
| Paramecium bursaria chlorella virus 1    | PBCV-1       |
| Only Syngen chlorella virus NE5          | OSyNE5       |
| Ectocarpus siliculosus virus-1           | EsV1         |
| Chlorella Pbi virus MT325                | MT325        |
| Acanthocystis turfacea chlorella virus-1 | ATCV-1       |
| Bathycoccus sp. RCC1105                  | BpV1         |
| Micromonas sp. RCC1109 virus             | MpV1         |
| Ostreococcus tauri virus RT-2011         | OtV6         |
| Dishui Lake phycodnavirus 1              | DSLVP1       |
| Yellow Lake phycodnavirus                | YLPV2        |
| Aureococcus anophagefferens virus-1      | AaV1         |
| Organic Lake phycodnavirus-2             | OLPV2        |
| Mycobacterium phage Myrna                | MpMyrna      |
| Mycobacterium phage Phabba               | MpPhabba     |
| Acinetobacter phage vB_AbaM_ME3          | AP           |
| Lactobacillus phage PLE                  | LpPLE2       |
| Vibrio phage 1.084.O._10N.261.49.F5      | Vp2          |
| Vibrio phage 2.275.O._10N.286.54.E11     | Vp3          |
| Vibrio phage 1.081.O._10N.286.52.C2      | Vp1          |
| Vibrio phage phi-pp2                     | Vpphipp2     |
| Vibrio phage VH7D                        | VpVh7        |
